# Supplementary material for: Development of a disease diagnostic model to predict the occurrence of central precocious puberty of female
Source: publisher site journal article supplement (doi:10.1515/jpem-2024-0419), 2025-01-16
Supplement: Supplementary file 2 [file j_jpem-2024-0419_suppl_001.docx]

**STable 1. Results of variable screening using logistic regression**

| **Variable** | **Estimate** | **Std.error** | **Statistic** | **P** |
| --- | --- | --- | --- | --- |
| Age | -2.04 | 0.716 | -2.848 | 0.004 |
| Height | -0.408 | 0.63 | -0.648 | 0.517 |
| Height SDS | 0.566 | 0.511 | 1.107 | 0.268 |
| Weight | -0.074 | 0.337 | -0.219 | 0.826 |
| Weight SDS | -0.473 | 0.384 | -1.23 | 0.219 |
| BMI | 0.346 | 0.323 | 1.072 | 0.284 |
| BMI SDS | 0.094 | 0.369 | 0.256 | 0.798 |
| BA | 4.096 | 1.053 | 3.888 | < 0.001 |
| BA/CA | -2.528 | 0.87 | -2.905 | 0.004 |
| Basal LH | 3.245 | 0.257 | 12.648 | < 0.001 |
| Basal FSH | 0.241 | 0.089 | 2.716 | 0.007 |
| E2 | 0.636 | 0.076 | 8.362 | < 0.001 |
| Uterine diameter | 0.691 | 0.077 | 8.955 | < 0.001 |
| Ovarian volume | 0.273 | 0.066 | 4.141 | < 0.001 |

BMI, body mass index; BA, bone age; CA, chronological age; LH, luteinizing hormone; FSH, follicle stimulating hormone; E2, estradiol.
